# Supplementary material
Source: PubMed Central journal article supplement (PMC8283558)
Supplement: jamaoncol-e211074-s001.pdf [file jamaoncol-e211074-s001.pdf]

## Supplemental Online Content

Scordo M, Wang TP, Ahn KW, et al. Outcomes associated with thiotepa-based conditioning in patients with primary central nervous system lymphoma after autologous hematopoietic cell transplant. *JAMA Oncol*. Published online May 6, 2021. doi:10.1001/jamaoncol.2021.1074

eTable 1. Variables Considered in the Multivariable Analysis

eTable 2. Multivariable Regression Analysis of Outcomes

eTable 3. Univariable Subgroup Analysis of Outcomes by Age Group

eTable 4. Conditioning Chemotherapy Regimen Details

eTable 5. Multivariate Regression – Inverse Probability Weighted Estimator (IPWE-PS) Based on Propensity Score and Inverse Probability Censoring Weighted Estimator (IPCW)

This supplemental material has been provided by the authors to give readers additional information about their work.

**eTable 1.** Variables Considered in the Multivariable Analysis

|                                                                                                                                                                                                                                                                                                                                                                                                                                                                                                                                                                                                                                                                                                                                                                                                                                                                                                                                    |
|------------------------------------------------------------------------------------------------------------------------------------------------------------------------------------------------------------------------------------------------------------------------------------------------------------------------------------------------------------------------------------------------------------------------------------------------------------------------------------------------------------------------------------------------------------------------------------------------------------------------------------------------------------------------------------------------------------------------------------------------------------------------------------------------------------------------------------------------------------------------------------------------------------------------------------|
| <p><b><u>Patient- and disease-specific characteristics, including:</u></b></p> <ul style="list-style-type: none"><li>- Age at the time of AHCT: continuous, 18-59 vs. <math>\geq 60</math></li><li>- Sex: female vs. male</li><li>- Race: Caucasian, African American, Asian, vs. others, missing</li><li>- KPS: 90-100 vs. <math>&lt; 90</math> vs. missing</li><li>- Hematopoietic cell transplantation-comorbidity index: 0 vs. 1-2 vs. <math>\geq 3</math> vs. missing</li><li>- Remission status prior to AHCT (time from diagnosis to HCT): CR1 (<math>\leq 6</math> months) vs. CR1 (<math>&gt; 6</math> months) vs. CR2+ (<math>&gt; 6</math> months) vs. PR (<math>\leq 6</math> months) vs. PR (<math>&gt; 6</math> months)</li></ul> <p><b><u>Transplantation-specific characteristics, including:</u></b></p> <ul style="list-style-type: none"><li>- Rituximab used in conditioning: Yes vs. No vs. missing</li></ul> |
|------------------------------------------------------------------------------------------------------------------------------------------------------------------------------------------------------------------------------------------------------------------------------------------------------------------------------------------------------------------------------------------------------------------------------------------------------------------------------------------------------------------------------------------------------------------------------------------------------------------------------------------------------------------------------------------------------------------------------------------------------------------------------------------------------------------------------------------------------------------------------------------------------------------------------------|

**Abbreviations:** AHCT = autologous hematopoietic cell transplant; CR = complete remission; KPS = Karnofsky performance status; PR = partial remission (includes any PR [e.g., PR1, PR2+]).

**eTable 2.** Multivariable Regression Analysis of Outcomes

|                             | N   | HR   | Prob<br>(95% CI) | P      | Overall<br>P |
|-----------------------------|-----|------|------------------|--------|--------------|
| <b>Relapse</b>              |     |      |                  |        |              |
| <b>Conditioning Regimen</b> |     |      |                  |        |              |
| TBC                         | 263 | 1.00 |                  |        | <.0001       |
| TT-BCNU                     | 275 | 1.79 | 1.07-2.98        | .03    |              |
| BEAM                        | 65  | 4.34 | 2.45-7.70        | <.0001 |              |
| <b>Contrast</b>             |     |      |                  |        |              |
| TT-BCNU vs. BEAM            |     | 0.41 | 0.25-0.69        | .0008  |              |
| <b>NRM</b>                  |     |      |                  |        |              |
| <b>Conditioning Regimen</b> |     |      |                  |        |              |
| TBC                         | 263 | 1    |                  |        | .03          |
| TT-BCNU                     | 275 | 0.50 | 0.29-0.87        | .01    |              |
| BEAM                        | 65  | 0.50 | 0.20-1.28        | .15    |              |
| <b>Age</b>                  |     |      |                  |        |              |
| 18-59                       | 309 | 1    |                  |        | .0001        |
| ≥60                         | 294 | 2.99 | 1.70-5.25        | .0001  |              |
| <b>HCT-CI</b>               |     |      |                  |        |              |
| 0                           | 151 | 1    |                  |        | <.0001       |
| 1-2                         | 186 | 1.65 | 0.66-4.14        | .29    |              |
| ≥3                          | 263 | 4.39 | 1.95-9.84        | .0003  |              |
| <b>Contrast</b>             |     |      |                  |        |              |
| TT-BCNU vs. BEAM            |     | 1.00 | 0.38-2.67        | .99    |              |
| HCT-CI: 1-2 vs. ≥3          |     | 0.38 | 0.20-0.70        | .002   |              |
| <b>PFS</b>                  |     |      |                  |        |              |
| <b>Conditioning Regimen</b> |     |      |                  |        |              |
| TBC                         | 263 | 1.00 |                  |        | .04          |
| TT-BCNU                     | 275 | 1.04 | 0.72-1.50        | .86    |              |
| BEAM                        | 65  | 1.74 | 1.10-2.75        | .02    |              |
| <b>Age</b>                  |     |      |                  |        |              |
| 18-59                       | 309 | 1.00 |                  |        | .007         |

|                                                          | <b>N</b> | <b>HR</b> | <b>Prob<br/>(95% CI)</b> | <b>P</b> | <b>Overall<br/>P</b> |
|----------------------------------------------------------|----------|-----------|--------------------------|----------|----------------------|
| ≥60                                                      | 294      | 1.58      | 1.13-2.75                | .007     |                      |
| <b>KPS</b>                                               |          |           |                          |          |                      |
| ≥90                                                      | 293      | 1.00      | 1.18-2.38                |          | .01                  |
| <90%                                                     | 294      | 1.68      | 0.60-3.92                | .004     |                      |
| Missing                                                  | 16       | 1.53      |                          | .37      |                      |
| <b>Disease Status/Time from Diagnosis to<br/>HCT</b>     |          |           |                          |          |                      |
| CR1 ≤6 month                                             | 161      | 1.00      |                          |          | .03                  |
| CR1 >6 months                                            | 177      | 1.65      | 0.98-.277                | .06      |                      |
| CR2+ >6 months                                           | 114      | 2.25      | 1.32-3.84                | .003     |                      |
| PR ≤6 months                                             | 44       | 1.46      | 0.69-3.10                | .33      |                      |
| PR >6 months                                             | 104      | 2.34      | 1.37-4.00                | .002     |                      |
| Missing                                                  | 3        | 2.47      | 0.32-19.34               | .39      |                      |
| <b>Contrast</b>                                          |          |           |                          |          |                      |
| TT-BCNU vs. BEAM                                         |          | 0.60      | 0.38-0.94                | .03      |                      |
| CR1 >6 months vs. CR2+ >6 months                         |          | 0.73      | 0.47-1.15                | .17      |                      |
| CR1 >6 months vs. PR ≤6 months                           |          | 1.13      | 0.56-2.28                | .73      |                      |
| CR1 >6 months vs. PR >6 months                           |          | 0.70      | 0.45-1.10                | .12      |                      |
| CR2+ >6 months vs. PR ≤6 months                          |          | 1.54      | 0.75-3.14                | .24      |                      |
| CR2+ >6 months vs. PR >6 months                          |          | 0.96      | 0.60-1.52                | .86      |                      |
| PR ≤6 months vs. PR >6 months                            |          | 0.62      | 0.31-1.26                | .18      |                      |
| <b>Overall Survival</b>                                  |          |           |                          |          |                      |
| <b>Conditioning Regimen<br/>(≤6 months after HCT)</b>    |          |           |                          |          |                      |
| TBC                                                      | 263      | 1.00      |                          |          | .008                 |
| TT-BCNU                                                  | 275      | 0.35      | 0.17-0.73                | .005     |                      |
| BEAM                                                     | 65       | 0.26      | 0.06-1.12                | .07      |                      |
| <b>Conditioning Regimen<br/>(&gt;6 months after HCT)</b> |          |           |                          |          |                      |
| TBC                                                      | 232      | 1.00      |                          |          | .002                 |
| TT-BCNU                                                  | 257      | 1.54      | 0.93-2.55                | .10      |                      |
| BEAM                                                     | 62       | 2.73      | 1.56-4.76                | .0004    |                      |

|                                                       | N   | HR   | Prob<br>(95% CI) | P     | Overall<br>P |
|-------------------------------------------------------|-----|------|------------------|-------|--------------|
| <b>Age</b>                                            |     |      |                  |       |              |
| 18-59                                                 | 309 | 1.00 |                  |       | .001         |
| ≥60                                                   | 294 | 1.84 | 1.27-2.67        | .001  |              |
| <b>HCT-CI</b>                                         |     |      |                  |       |              |
| 0                                                     | 153 | 1.00 |                  |       | .004         |
| 1-2                                                   | 186 | 1.24 | 0.73-2.09        | .43   |              |
| ≥3                                                    | 264 | 2.04 | 1.27-3.28        | .003  |              |
| <b>Disease Status/<br/>Time from Diagnosis to HCT</b> |     |      |                  |       |              |
| CR1 ≤6 months                                         | 161 | 1.00 |                  |       | .01          |
| CR1 >6 months                                         | 177 | 2.05 | 1.12-3.76        | .02   |              |
| CR2+ >6 months                                        | 114 | 2.42 | 1.30-4.53        | .006  |              |
| PR ≤6 months                                          | 44  | 1.70 | 0.72-4.02        | .23   |              |
| PR >6 months                                          | 104 | 3.29 | 1.79-6.04        | .0001 |              |
| Missing                                               | 3   | 4.08 | 0.53-31.55       | .18   |              |
| <b>Contrast</b>                                       |     |      |                  |       |              |
| TT-BCNU vs. BEAM (≤6 months)                          |     | 1.33 | 0.29-6.08        | .71   |              |
| TT-BCNU vs. BEAM (>6 months)                          |     | 0.56 | 0.33-0.96        | .03   |              |
| HCT-CI: 1-2 vs. ≥3                                    |     | 0.61 | 0.40-0.92        | .02   |              |
| CR1 >6 months vs. CR2+ >6 months                      |     | 0.85 | 0.52-1.38        | .50   |              |
| CR1 >6 months vs. PR ≤6 months                        |     | 1.21 | 0.56-2.61        | .63   |              |
| CR1 >6 months vs. PR >6 months                        |     | 0.62 | 0.39-1.00        | .05   |              |
| CR2+ >6 months vs. PR ≤6 months                       |     | 1.43 | 0.65-3.13        | .37   |              |

**Abbreviations:** BEAM = carmustine, etoposide, cytarabine, melphalan; CR = complete remission; HCT-CI = hematopoietic cell transplantation comorbidity index; KPS = Karnofsky performance status; NRM = non-relapse mortality; OS = overall survival; PR = partial remission (includes any PR [e.g., PR1, PR2+]); PFS = progression-free survival; TBC = thiotepa, busulfan, cyclophosphamide; TT-BCNU = thiotepa, carmustine.

**eTable 3.** Univariable Subgroup Analysis of Outcomes by Age Group

| Outcomes       | TBC                | TT-BCNU            | BEAM              | TBC                | TT-BCNU            | BEAM              | <i>P</i><br>Age ≤59 | <i>P</i><br>Age ≥60 |
|----------------|--------------------|--------------------|-------------------|--------------------|--------------------|-------------------|---------------------|---------------------|
|                | Age ≤59<br>(N=147) | Age ≤59<br>(N=131) | Age ≤59<br>(N=31) | Age ≥60<br>(N=116) | Age ≥60<br>(N=144) | Age ≥60<br>(N=34) |                     |                     |
|                | Prob (95%<br>CI)   | Prob (95%<br>CI)   | Prob (95%<br>CI)  | Prob (95%<br>CI)   | Prob (95%<br>CI)   | Prob (95%<br>CI)  |                     |                     |
| <b>NRM</b>     |                    |                    |                   |                    |                    |                   | .70                 | .08                 |
| 100-day        | 3% (1-6)           | 0%                 | 0%                | 11% (6-18)         | 4% (1-7)           | 0%                |                     | <.001               |
| 1-year         | 4% (2-8)           | 1% (0-3)           | 3% (0-12)         | 17% (11-25)        | 7% (4-12)          | 6% (1-17)         | .01                 | .04                 |
| 3-year         | 6% (2-10)          | 6% (2-13)          | 3% (0-12)         | 21% (14-29)        | 13% (7-22)         | 10% (2-24)        | .004                | .22                 |
| <b>Relapse</b> |                    |                    |                   |                    |                    |                   | <.001               | .04                 |
| 1-year         | 5% (2-9)           | 12% (7-19)         | 19% (7-35)        | 7% (3-13)          | 7% (4-12)          | 26% (12-42)       | .02                 | .08                 |
| 3-year         | 8% (4-14)          | 15% (8-22)         | 43% (24-62)       | 14% (8-23)         | 15% (8-22)         | 30% (15-47)       | .002                | .25                 |
| <b>PFS</b>     |                    |                    |                   |                    |                    |                   | <.001               | .25                 |
| 1-year         | 91% (86-95)        | 87% (80-92)        | 78% (61-90)       | 76% (67-83)        | 86% (79-91)        | 68% (51-83)       | .16                 | .04                 |
| 3-year         | 86% (79-92)        | 79% (70-87)        | 54% (35-72)       | 65% (55-74)        | 72% (62-81)        | 60% (43-77)       | .005                | .43                 |
| <b>OS</b>      |                    |                    |                   |                    |                    |                   | .13                 | .06                 |
| 1-year         | 92% (88-96)        | 94% (89-97)        | 90% (77-98)       | 82% (74-88)        | 90% (85-94)        | 88% (75-97)       | .82                 | .17                 |
| 3-year         | 90% (84-95)        | 81% (71-89)        | 73% (55-88)       | 69% (59-78)        | 76% (66-85)        | 57% (39-74)       | .05                 | .15                 |

**Abbreviations:** BEAM = carmustine, etoposide, cytarabine, melphalan; NRM = non-relapse mortality; OS = overall survival; PFS = progression-free survival; TBC = thiotepa, busulfan, cyclophosphamide; TT-BCNU = thiotepa, carmustine.

**eTable 4.** Conditioning Chemotherapy Regimen Details

| Chemotherapy Agent              | TT-BCNU (N=275)      |                      |                        |
|---------------------------------|----------------------|----------------------|------------------------|
|                                 | TBC (N=263)          |                      | BEAM (N=65)*           |
|                                 | Mean; Median (range) | Mean; Median (range) | Mean; Median (range)   |
| Thiotepa (mg/kg)                | 17; 18 (5-23)        | 15; 20 (8-30)        | -                      |
| Busulfan (mg/kg)                | 9; 10 (6-17)         | -                    | -                      |
| Cyclophosphamide (mg/kg)        | 116; 120 (60-125)    | -                    | -                      |
| BCNU (mg/m <sup>2</sup> )       | -                    | 398; 400 (300-400)   | 299; 300 (240-300)     |
| Etoposide (mg/m <sup>2</sup> )  | -                    | -                    | 969; 800 (400-1645)    |
| Cytarabine (mg/m <sup>2</sup> ) | -                    | -                    | 1600; 1600 (1600-1600) |
| Melphalan (mg/m <sup>2</sup> )  | -                    | -                    | 139; 140 (100-140)     |

**Abbreviations:** BEAM = carmustine, etoposide, cytarabine, melphalan; TBC = thiotepa, busulfan, cyclophosphamide; TT-BCNU = thiotepa, carmustine.

\*: BEAM cohort included 7 patients who received a 'BEAM-like' regimen wherein melphalan was substituted with a comparable alkylator(s).

**eTable 5.** Multivariate Regression – Inverse Probability Weighted Estimator Based on Propensity Score and Inverse Probability Censoring Weighted Estimator

|                             | <b>N</b> | <b>HR</b> | <b>Prob<br/>(95% CI)</b> | <b>P</b> | <b>Overall P</b> |
|-----------------------------|----------|-----------|--------------------------|----------|------------------|
| <b>Relapse (IPWE-PS)</b>    |          |           |                          |          |                  |
| <b>Conditioning Regimen</b> |          |           |                          |          |                  |
| TBC                         | 254      | 1.00      |                          |          | .002             |
| TT-BCNU                     | 264      | 1.79      | 0.99-3.25                | .05      |                  |
| BEAM                        | 63       | 4.20      | 1.92-9.22                | <.0001   |                  |
| <b>Relapse (IPCW)</b>       |          |           |                          |          |                  |
| <b>Conditioning Regimen</b> |          |           |                          |          |                  |
| TBC                         | 254      | 1.00      |                          |          | <.0001           |
| TT-BCNU                     | 264      | 1.23      | 0.64-2.34                | .54      |                  |
| BEAM                        | 63       | 5.87      | 2.93-11.79               | <.0001   |                  |
| <b>NRM (IPWE-PS)</b>        |          |           |                          |          |                  |
| <b>Conditioning Regimen</b> |          |           |                          |          |                  |
| TBC                         | 254      | 1.00      |                          |          | .03              |
| TT-BCNU                     | 264      | 0.45      | 0.25-0.82                | .009     |                  |
| BEAM                        | 63       | 0.33      | 0.03-3.97                | .38      |                  |
| <b>NRM (IPCW)</b>           |          |           |                          |          |                  |
| <b>Conditioning Regimen</b> |          |           |                          |          |                  |
| TBC                         | 254      | 1.00      |                          |          | .38              |
| TT-BCNU                     | 264      | 0.59      | 0.28-1.25                | .17      |                  |
| BEAM                        | 63       | 0.61      | 0.01-28.75               | .80      |                  |
| <b>PFS (IPWE-PS)</b>        |          |           |                          |          |                  |
| <b>Conditioning Regimen</b> |          |           |                          |          |                  |
| TBC                         | 254      | 1.00      |                          |          | .20              |
| TT-BCNU                     | 264      | 0.99      | 0.66-1.48                | .95      |                  |
| BEAM                        | 63       | 1.70      | 0.89-3.25                | .10      |                  |
| <b>PFS (IPCW)</b>           |          |           |                          |          |                  |
| <b>Conditioning Regimen</b> |          |           |                          |          |                  |
| TBC                         | 254      | 1.00      |                          |          | .02              |
| TT-BCNU                     | 264      | 0.82      | 0.48-1.37                | .44      |                  |
| BEAM                        | 63       | 2.04      | 1.08-3.87                | .03      |                  |



|                                | N   | HR   | Prob<br>(95% CI) | P      | Overall P |
|--------------------------------|-----|------|------------------|--------|-----------|
| <b>OS (IPWE-PS)</b>            |     |      |                  |        |           |
| <b>Conditioning Regimen</b>    |     |      |                  |        |           |
| <b>(≤6 Months Post-HCT)</b>    |     |      |                  |        |           |
| TBC                            | 254 | 1.00 |                  |        | .007      |
| TT-BCNU                        | 266 | 0.28 | 0.12-0.62        | .002   |           |
| BEAM                           | 65  | 0.13 | 0.00-0.37        | <.0001 |           |
| <b>Conditioning Regimen</b>    |     |      |                  |        |           |
| <b>(&gt;6 Months Post-HCT)</b> |     |      |                  |        |           |
| TBC                            | 224 | 1.00 |                  |        | .04       |
| TT-BCNU                        | 249 | 1.45 | 0.86-2.43        | .16    |           |
| BEAM                           | 62  | 2.50 | 1.23-5.10        | .01    |           |
| <b>OS (IPCW)</b>               |     |      |                  |        |           |
| <b>Conditioning Regimen</b>    |     |      |                  |        |           |
| <b>(≤6 Months Post-HCT)</b>    |     |      |                  |        |           |
| TBC                            | 254 | 1.00 |                  |        | .09       |
| TT-BCNU                        | 266 | 0.34 | 0.13-0.91        | .03    |           |
| BEAM                           | 65  | 0.38 | 0.00-1.29        | .07    |           |
| <b>Conditioning Regimen</b>    |     |      |                  |        |           |
| <b>(&gt;6 Months Post-HCT)</b> |     |      |                  |        |           |
| TBC                            | 224 | 1.00 |                  |        | .01       |
| TT-BCNU                        | 249 | 1.60 | 0.70-3.64        | .26    |           |
| BEAM                           | 62  | 4.04 | 1.63-10.02       | .003   |           |

**Abbreviations:** BEAM = carmustine, etoposide, cytarabine, melphalan; IPCW = inverse probability of censoring weighted estimator; IPWE-PS = inverse probability weighted estimator based on propensity score; NRM = non-relapse mortality; OS = overall survival; PFS = progression-free survival; TBC = thiotepa, busulfan, cyclophosphamide; TT-BCNU = thiotepa, carmustine.

Missing values in time from diagnosis to HCT and KPS were excluded from the sensitivity analysis.
